# Supplementary material for: Field interventions for climate change mitigation behaviors: A second-order meta-analysis
Source: PubMed Central journal article supplement — Proc Natl Acad Sci U S A. 2023 Mar 21;120(13):e2214851120. doi: 10.1073/pnas.2214851120 (PMC10068847; doi:10.1073/pnas.2214851120), 2023-03-21
Supplement: pnas.2214851120.sapp.pdf [file pnas.2214851120.sapp.pdf]

## Appendix A

**Table A.** *Study characteristics of the included meta-analyses.*

| Study                      | k   | N         | Intervention                                                                      | Outcome                 | Mean effect size (in <i>d</i> or <i>g</i> ) | Uniqueness (in %) |
|----------------------------|-----|-----------|-----------------------------------------------------------------------------------|-------------------------|---------------------------------------------|-------------------|
| Ahir & Chakraborty, 2021   | 40  | 195,103   | Feedback                                                                          | Conservation            | $d = 0.10$ [0.09, 0.11]                     | 77%               |
| Bergquist et al., 2019     | 91  | 227,730   | Social comparison                                                                 | PEB                     | $d = 0.32$ [0.28, 0.37]                     | 66%               |
| Karlin et al., 2015        | 42  | 256,536   | Feedback                                                                          | Conservation            | $d = 0.14$ [0.09, 0.19]                     | 46%               |
| Khanna et al., 2021        | 360 | 1,132,864 | Financial incentives, education, feedback, social comparison & commitment         | Conservation            | $d = 0.30$ [0.24, 0.34]                     | 58%               |
| Maki et al., 2016          | 25  | 2971      | Financial incentives                                                              | PEB                     | $d = 0.36$ [0.22, 0.50]                     | 32%               |
| Mi et al., 2021            | 112 | 13998     | Financial incentives & education                                                  | Energy conservation     | $d = 0.43$ [0.37, 0.48]                     | 48%               |
| Nisa et al., 2019          | 144 | 3,092,678 | Education, social comparison, commitment, appeals & nudges                        | PEB                     | $d = 0.19$ [0.15, 0.24]                     | 37%               |
| Osbaldiston & Schott, 2012 | 253 |           | Various                                                                           | PEB                     | $g = 0.45$ [0.43, 0.47]                     | 48%               |
| Semenescu et al., 2020     | 41  | 11206     | Education & feedback                                                              | Transportation behavior | $g = 0.16$ [0.11, 0.21]                     | 58%               |
| Varotto & Spagnoli, 2017   | 70  |           | Education, feedback, commitment, financial incentives, nudging & social influence | Recycling               | $g = 0.29$ [0.24, 0.33]                     | 64%               |

## Appendix B

### Formulas for effect size conversion

Converting from  $r$  to  $d$  (Borenstein, 2009)

$$d = \frac{2r}{\sqrt{1-r^2}} \quad V_d = \frac{4V_r}{(1-r^2)^3}$$

Converting from Fisher's  $z$  scale to  $r$  (Borenstein, 2009)

$$r = \frac{e^{2z} - 1}{e^{2z} + 1}$$

Calculating Variance from Confidence Intervals (Schmidt & Hunter, 2015)

$$SE = \frac{(95\%CI_U - 95\%CI_L)}{2 \times 1.96}$$

$$Variance(d) = SE^2$$

$$Variance(r) = SE^2$$

### Corrected Covered Area

$$CCA = \frac{N-r}{(r \times c)-r},$$

where  $N$  is the sum of the number of all primary studies per meta-analysis,  $r$  is the number of unique primary studies across meta-analyses and  $c$  is the number of meta-analyses (Pieper et al., 2014).

## Appendix C

**Table B.** *Assessment of publication bias in each included meta-analysis.*

| Authors and Year            | K estimates | Type of assessment                                                    | Interpretation (by original authors)                                                           |
|-----------------------------|-------------|-----------------------------------------------------------------------|------------------------------------------------------------------------------------------------|
| Nisa et al. (2019)          | 144         | Funnel plot, Egger's test                                             | Small-study bias, asymmetry                                                                    |
| Mi et al. (2021)            | 112         | Funnel plot, fail-safe N                                              | Low probability of publication bias                                                            |
| Osbaldiston & Schott (2012) | 253         | None                                                                  | None                                                                                           |
| Maki et al. (2016)          | 25          | Egger's test                                                          | No small-study bias present                                                                    |
| Varotto & Spagnolli (2017)  | 70          | Egger's test, rank correlation test, trim and fill, fail-safe N       | Small-study bias, would lower the effect size ( $\Delta g = -0.2$ ), moderate publication bias |
| Karlin et al. (2015)        | 42          | Moderator analysis on publication type and sample size, trim and fill | Small-study bias, moderate publication bias                                                    |
| Bergquist et al. (2019)     | 91          | Funnel plot, trim and fill, fail-safe N                               | asymmetry, slightly lower effect size                                                          |
| Semenescu et al. (2020)     | 41          | Funnel plot, trim and fill                                            | Low asymmetry, slightly lower effect size ( $\Delta g = -0.053$ ), moderate publication bias   |
| Khanna et al. (2021)        | 360         | Funnel plot, Egger's test                                             | Small-study bias, Asymmetry                                                                    |
| Ahir & Chakraborty (2021)   | 40          | None                                                                  | None                                                                                           |

*Note.* Asymmetry refers to the fact that the authors detected an asymmetric distribution in the funnel plot.

## Appendix D

**Figure A.** *P*-curve for 326 studies.

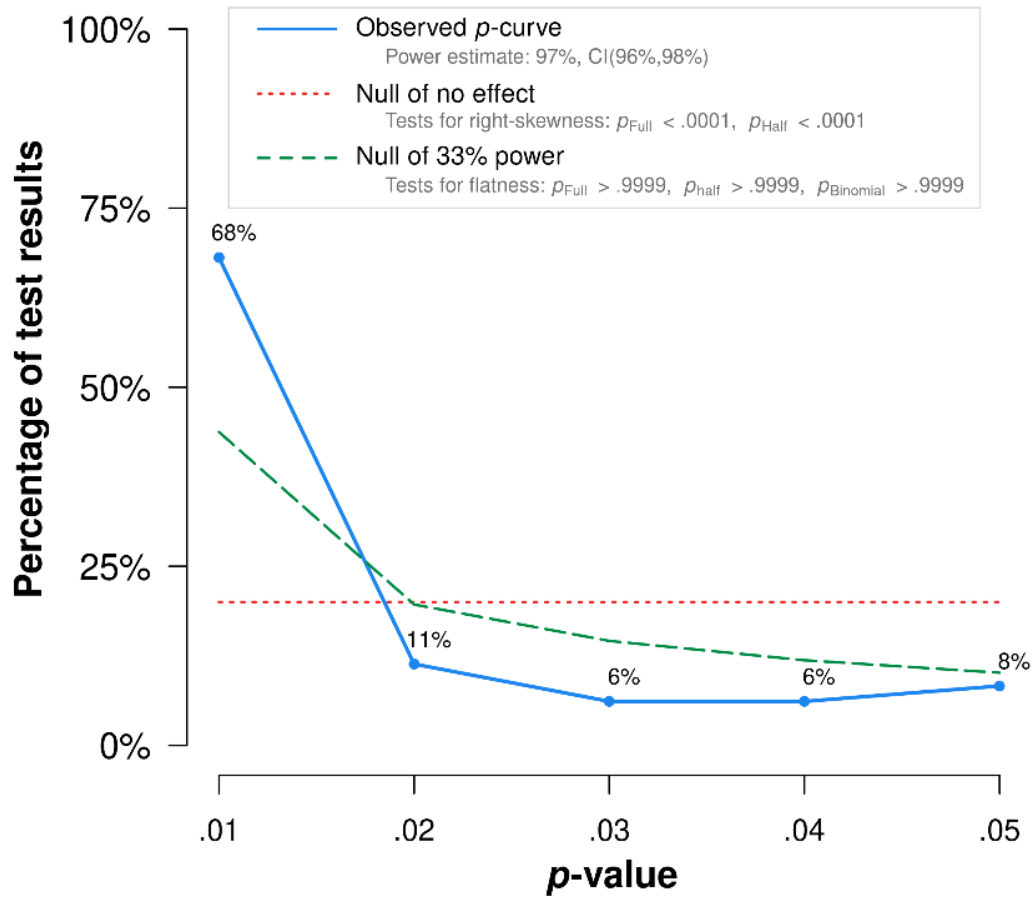

Note: The observed *p*-curve includes 326 statistically significant ( $p < .05$ ) results, of which 271 are  $p < .025$ . There were 305 additional results entered but excluded from *p*-curve because they were  $p > .05$ .

**Figure B.** *Distributional p*-curve for 326 studies.

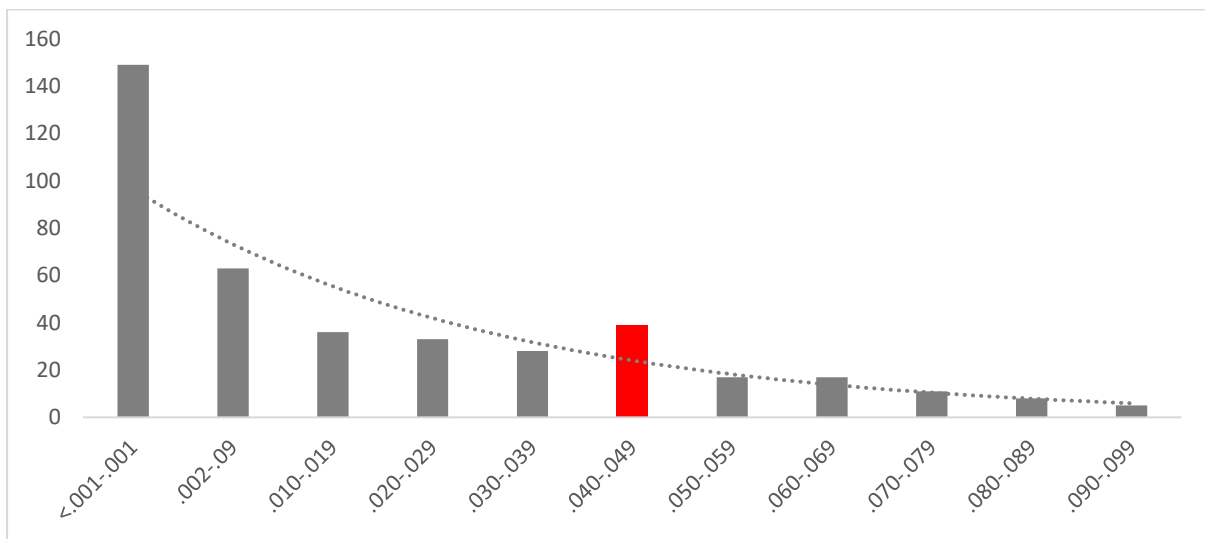

## Appendix E

**Figure D.** *Distribution of number of participants included in each type of interventions.*

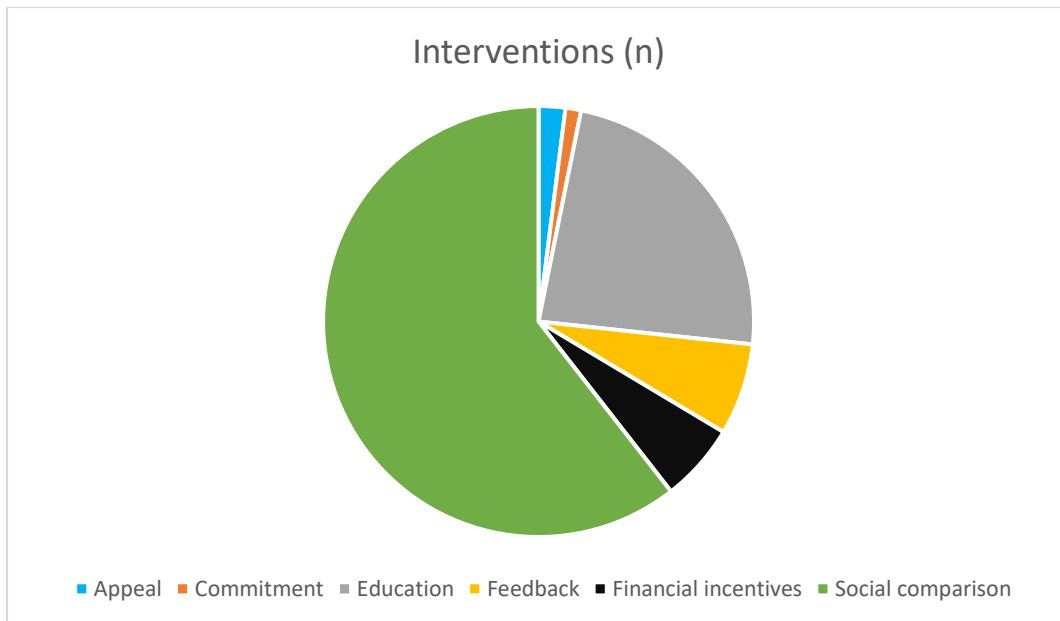

**Figure E.** *Distribution of type of interventions.*

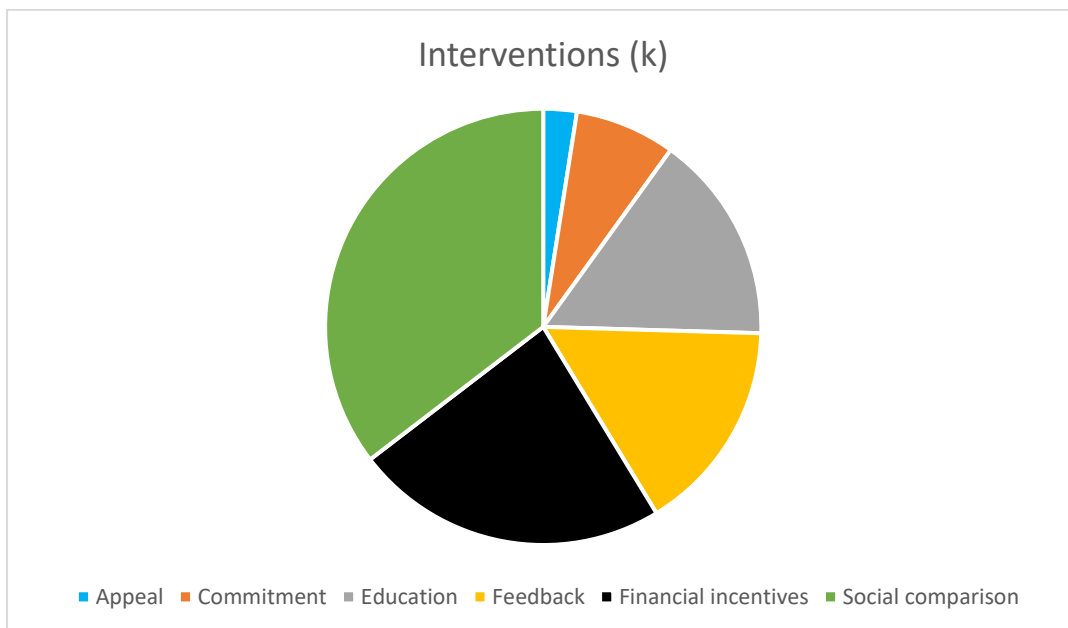

**Figure F1.** Descriptive statistics and *p*-curve from intervention type Appeal

*k* = 8

*n*: min = 100, max = 13969, mean = 2494, sd = 4885, sum = 19956

WAAP: *r* = .24 (95% CI .13, .34), *k* = 6

Selection models: N/A

*p*-curve analysis:

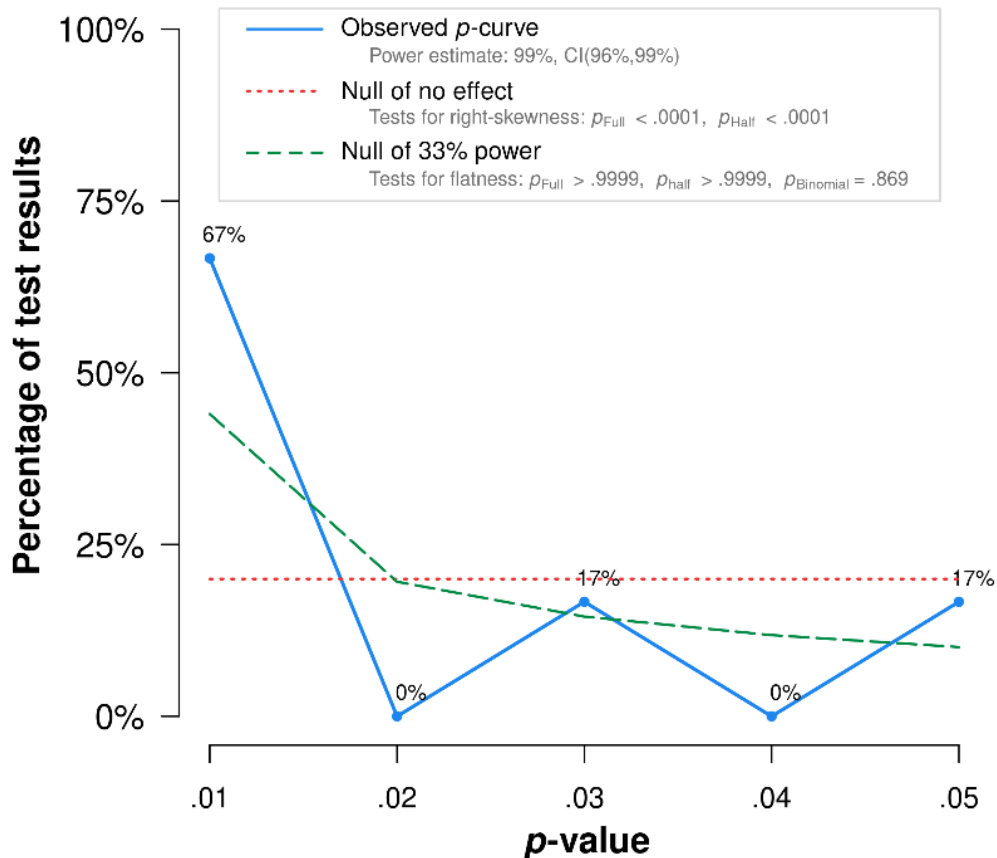

Note: The observed *p*-curve includes 6 statistically significant ( $p < .05$ ) results, of which 5 are  $p < .025$ . There were 2 additional results entered but excluded from *p*-curve because they were  $p > .05$ .

|                                                                                    | Binomial Test                  | Continuous Test                         |                                          |
|------------------------------------------------------------------------------------|--------------------------------|-----------------------------------------|------------------------------------------|
|                                                                                    | (Share of results $p < .025$ ) | (Aggregate with Stouffer Method)        |                                          |
|                                                                                    |                                | Full <i>p</i> -curve<br>( $p$ 's < .05) | Half <i>p</i> -curve<br>( $p$ 's < .025) |
| 1) Studies contain evidential value.<br>(Right skew)                               | $p = .1094$                    | $Z = -6.95, p < .0001$                  | $Z = -7.61, p < .0001$                   |
| 2) Studies' evidential value, if any, is inadequate.<br>(Flatter than 33% power)   | $p = .869$                     | $Z = 4.66, p > .9999$                   | $Z = 6.97, p > .9999$                    |
|                                                                                    |                                | Statistical Power                       |                                          |
| Power of tests included in <i>p</i> -curve<br>(correcting for selective reporting) |                                | Estimate: 99%                           |                                          |
|                                                                                    |                                | 90% Confidence interval: (96% , 99%)    |                                          |

**Figure F2.** Descriptive statistics and *p*-curve from intervention type Commitment

*k* = 24

*n*: min = 11, max = 1791, mean = 282, sd = 694, sum = 11620

WAAP: *r* = .065 (95% CI .06, .07), *k* = 5

Selection models: *r* = .07 (95% CI .05, .09)

*p*-curve analysis:

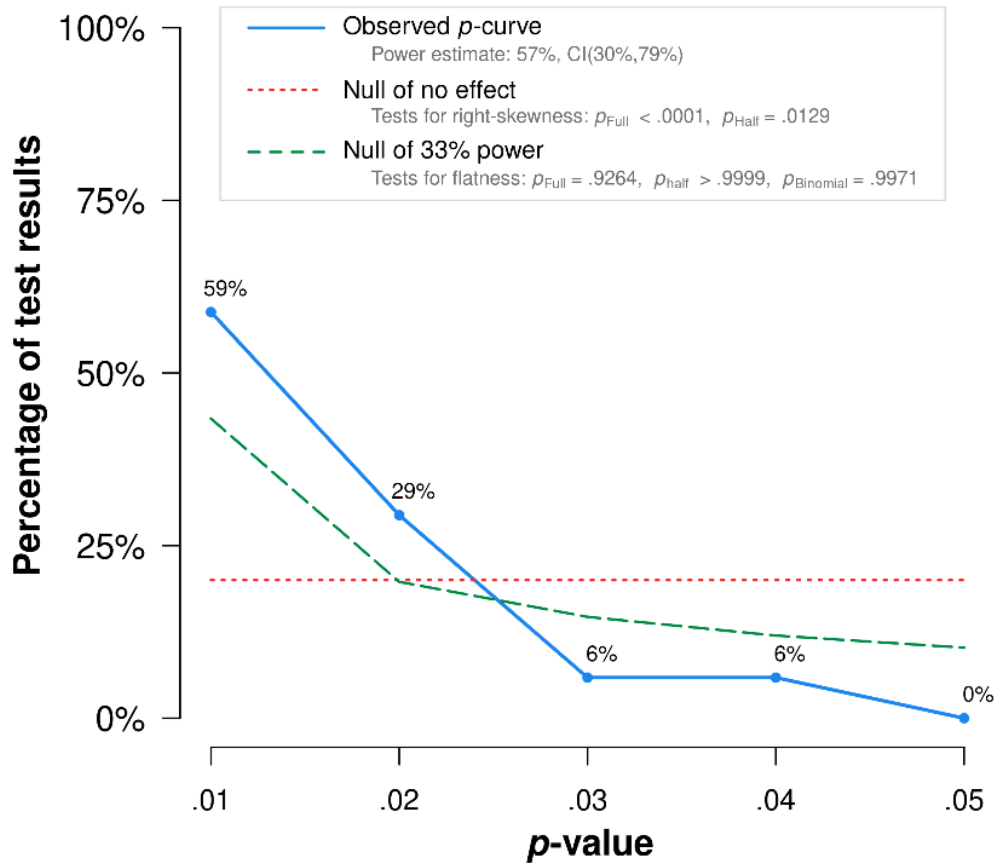

Note: The observed *p*-curve includes 17 statistically significant ( $p < .05$ ) results, of which 16 are  $p < .025$ . There were 7 additional results entered but excluded from *p*-curve because they were  $p > .05$ .

|                                                                                    | Binomial Test                  | Continuous Test                         |                                          |
|------------------------------------------------------------------------------------|--------------------------------|-----------------------------------------|------------------------------------------|
|                                                                                    | (Share of results $p < .025$ ) | (Aggregate with Stouffer Method)        |                                          |
|                                                                                    |                                | Full <i>p</i> -curve<br>( $p$ 's < .05) | Half <i>p</i> -curve<br>( $p$ 's < .025) |
| 1) Studies contain evidential value.<br>(Right skew)                               | $p = .0001$                    | $Z = -4.31, p < .0001$                  | $Z = -2.23, p = .0129$                   |
| 2) Studies' evidential value, if any, is inadequate.<br>(Flatter than 33% power)   | $p = .9971$                    | $Z = 1.45, p = .9264$                   | $Z = 4.18, p > .9999$                    |
|                                                                                    |                                | Statistical Power                       |                                          |
| Power of tests included in <i>p</i> -curve<br>(correcting for selective reporting) |                                | Estimate: 57%                           |                                          |
|                                                                                    |                                | 90% Confidence interval: (30% , 79%)    |                                          |

**Figure F3.** Descriptive statistics and *p*-curve from intervention type Education.

*k* = 50

*n*: min = 8, max = 78600, mean = 4679, sd = 14048, sum = 233592

WAAP: *r* = .03 (95% CI .02, .04), *k* = 13

Selection models: *r* = .21 (95% CI .04, .35)

*p*-curve analysis:

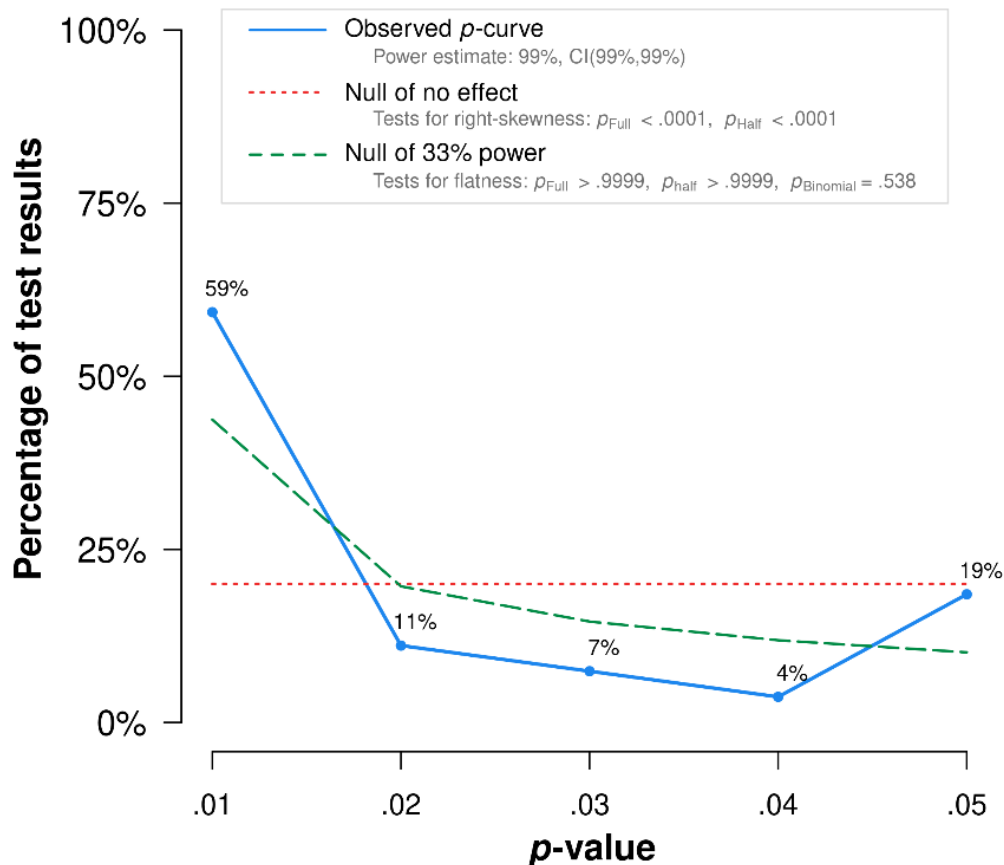

Note: The observed *p*-curve includes 27 statistically significant ( $p < .05$ ) results, of which 19 are  $p < .025$ . There were 23 additional results entered but excluded from *p*-curve because they were  $p > .05$ .

|                                                                                    | Binomial Test                  | Continuous Test                                       |                                          |
|------------------------------------------------------------------------------------|--------------------------------|-------------------------------------------------------|------------------------------------------|
|                                                                                    | (Share of results $p < .025$ ) | (Aggregate with Stouffer Method)                      |                                          |
|                                                                                    |                                | Full <i>p</i> -curve<br>( $p$ 's < .05)               | Half <i>p</i> -curve<br>( $p$ 's < .025) |
| 1) Studies contain evidential value.<br>(Right skew)                               | $p = .0261$                    | $Z = -14.79, p < .0001$                               | $Z = -18.21, p < .0001$                  |
| 2) Studies' evidential value, if any, is inadequate.<br>(Flatter than 33% power)   | $p = .538$                     | $Z = 9.79, p > .9999$                                 | $Z = 15.63, p > .9999$                   |
|                                                                                    |                                | Statistical Power                                     |                                          |
| Power of tests included in <i>p</i> -curve<br>(correcting for selective reporting) |                                | Estimate: 99%<br>90% Confidence interval: (99% , 99%) |                                          |



**Figure F4.** Descriptive statistics and p-curve from intervention type Feedback

k = 51

n: min = 8, max = 15000, mean = 1341, SD = 2988, sum = 68415

WAAP: r = .03 (95% CI .02, .04), k = 5

Selection models: r = .07 (95% CI .02, .11)

p-curve analysis:

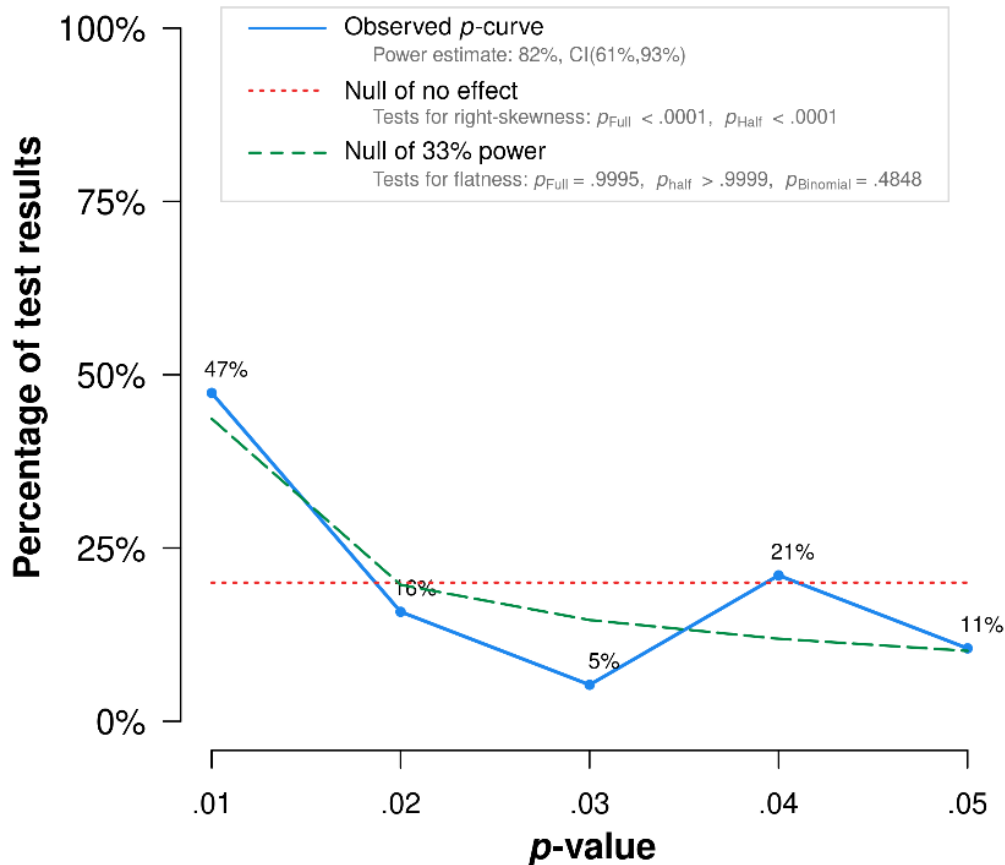

Note: The observed p-curve includes 19 statistically significant ( $p < .05$ ) results, of which 13 are  $p < .025$ . There were 32 additional results entered but excluded from p-curve because they were  $p > .05$ .

|                                                                                  | Binomial Test                  | Continuous Test                                       |                                     |
|----------------------------------------------------------------------------------|--------------------------------|-------------------------------------------------------|-------------------------------------|
|                                                                                  | (Share of results $p < .025$ ) | (Aggregate with Stouffer Method)                      |                                     |
|                                                                                  |                                | Full p-curve<br>( $p$ 's $< .05$ )                    | Half p-curve<br>( $p$ 's $< .025$ ) |
| 1) Studies contain evidential value.<br>(Right skew)                             | $p = .0835$                    | $Z = -6.52, p < .0001$                                | $Z = -7.7, p < .0001$               |
| 2) Studies' evidential value, if any, is inadequate.<br>(Flatter than 33% power) | $p = .4848$                    | $Z = 3.28, p = .9995$                                 | $Z = 7.93, p > .9999$               |
|                                                                                  |                                | <b>Statistical Power</b>                              |                                     |
| Power of tests included in p-curve<br>(correcting for selective reporting)       |                                | Estimate: 82%<br>90% Confidence interval: (61% , 93%) |                                     |

**Figure F5.** Descriptive statistics and *p*-curve from intervention type Financial incentives.

$k = 75$

$n$ : min = 8, max = 15000, mean = 780, sd = 2326, sum = 58547

WAAP:  $r = .07$  (95% CI .03, .11).  $k = 8$

Selection models:  $r = .17$  (95% CI .07, .27)

*p*-curve analysis:

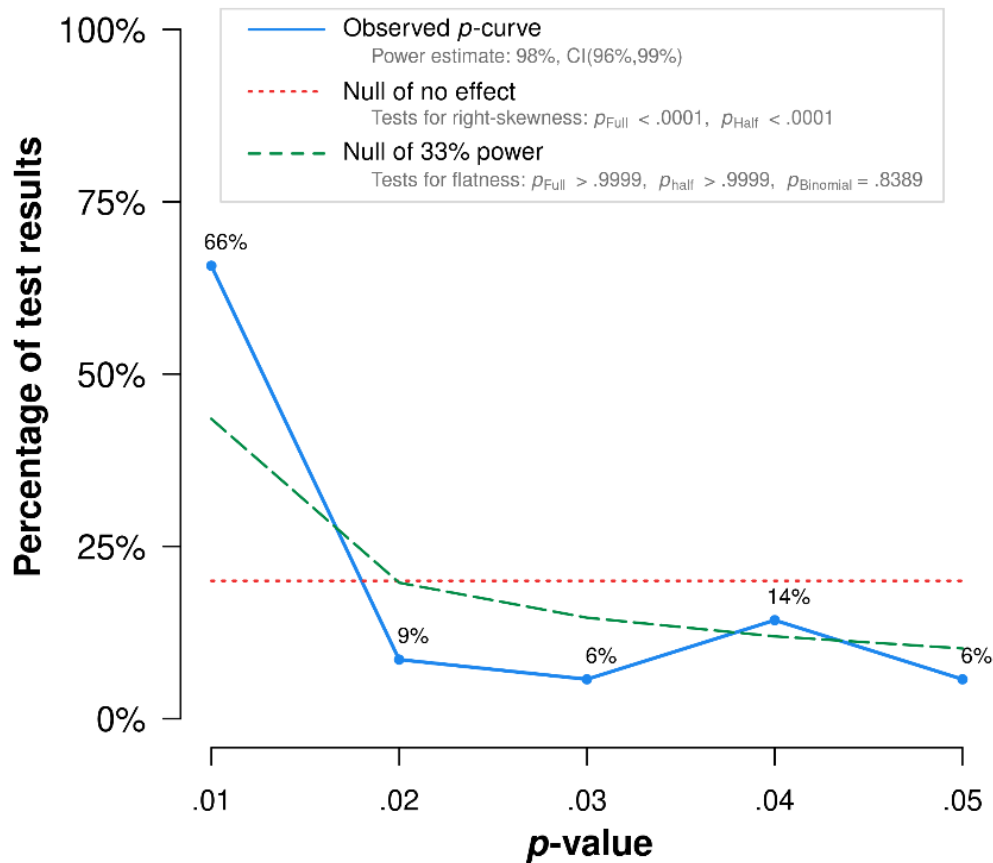

Note: The observed *p*-curve includes 35 statistically significant ( $p < .05$ ) results, of which 27 are  $p < .025$ . There were 40 additional results entered but excluded from *p*-curve because they were  $p > .05$ .

|                                                                                    | Binomial Test                  | Continuous Test                            |                                             |
|------------------------------------------------------------------------------------|--------------------------------|--------------------------------------------|---------------------------------------------|
|                                                                                    | (Share of results $p < .025$ ) | (Aggregate with Stouffer Method)           |                                             |
|                                                                                    |                                | Full <i>p</i> -curve<br>( $p$ 's $< .05$ ) | Half <i>p</i> -curve<br>( $p$ 's $< .025$ ) |
| 1) Studies contain evidential value.<br>(Right skew)                               | $p = .0009$                    | $Z = -14.26, p < .0001$                    | $Z = -15.47, p < .0001$                     |
| 2) Studies' evidential value, if any, is inadequate.<br>(Flatter than 33% power)   | $p = .8389$                    | $Z = 9.03, p > .9999$                      | $Z = 14.01, p > .9999$                      |
|                                                                                    |                                | Statistical Power                          |                                             |
| Power of tests included in <i>p</i> -curve<br>(correcting for selective reporting) |                                | Estimate: 98%                              |                                             |
|                                                                                    |                                | 90% Confidence interval: (96%, 99%)        |                                             |

**Figure F6.** Descriptive statistics and *p*-curve from intervention type Social comparison.

*k* = 114

*n*: min = 6, max = 106467, mean = 5282, sd = 17897, sum = 602149

WAAP: *r* = .03 (95% CI .02, .04), *k* = 13

Selection models: *r* = .06 (95% CI -.02, .15)

*p*-curve analysis:

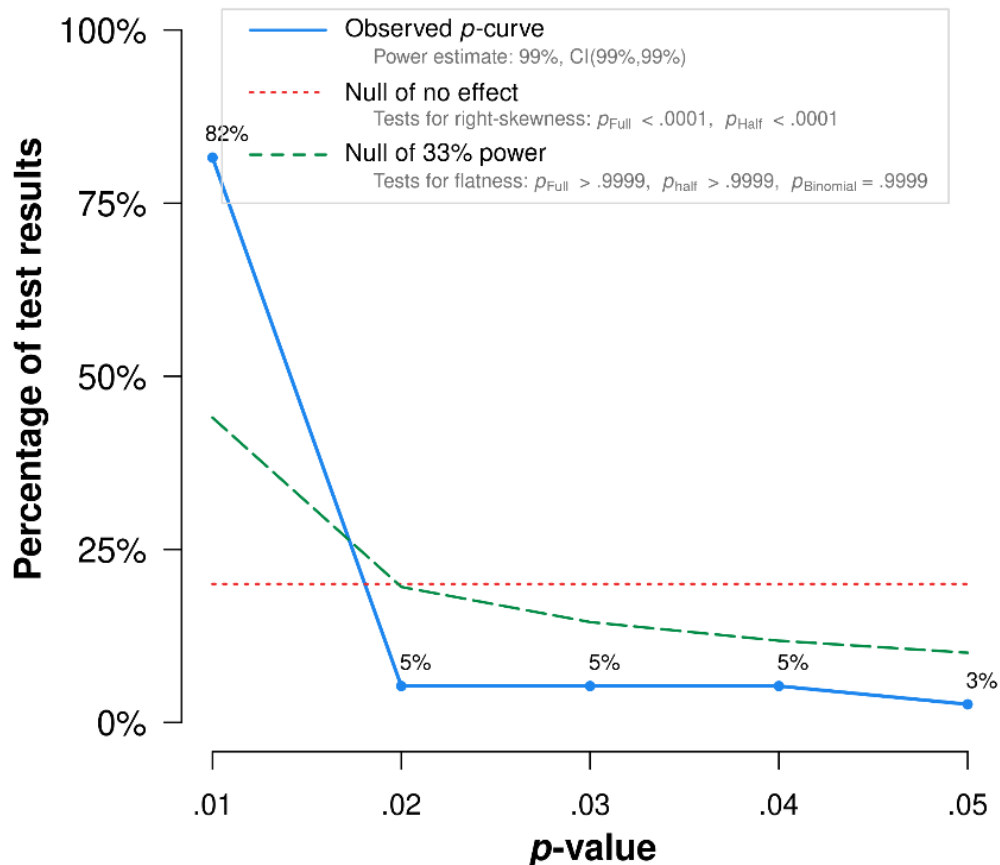

Note: The observed *p*-curve includes 76 statistically significant ( $p < .05$ ) results, of which 67 are  $p < .025$ . There were 38 additional results entered but excluded from *p*-curve because they were  $p > .05$ .

|                                                                                    | Binomial Test                  | Continuous Test                                       |                                             |
|------------------------------------------------------------------------------------|--------------------------------|-------------------------------------------------------|---------------------------------------------|
|                                                                                    | (Share of results $p < .025$ ) | (Aggregate with Stouffer Method)                      |                                             |
|                                                                                    |                                | Full <i>p</i> -curve<br>( $p$ 's $< .05$ )            | Half <i>p</i> -curve<br>( $p$ 's $< .025$ ) |
| 1) Studies contain evidential value.<br>(Right skew)                               | $p < .0001$                    | $Z = -32.5, p < .0001$                                | $Z = -33.21, p < .0001$                     |
| 2) Studies' evidential value, if any, is inadequate.<br>(Flatter than 33% power)   | $p = .9999$                    | $Z = 23.37, p > .9999$                                | $Z = 28.56, p > .9999$                      |
|                                                                                    |                                | <b>Statistical Power</b>                              |                                             |
| Power of tests included in <i>p</i> -curve<br>(correcting for selective reporting) |                                | Estimate: 99%<br>90% Confidence interval: (99% , 99%) |                                             |

## Appendix F

**Table C.** (1) number of meta-analyses; (2) number of meta-analytical effect sizes; (3) number of primary studies; (4) second-order, grand mean standardized difference estimate; (5) lower limit of the 95% confidence interval; (6) upper limit of the 95% confidence interval; (7) observed variance across first-order mean standardized difference estimates; (8) expected second-order sampling error variance; (9) estimated true variance across first-order mean standardized difference estimates (expected sampling error variance removed); (10) proportion of the variance across the first-order meta-analytic means that is due to second order sampling error variance.

|                             | Meta-analyses<br>$m$ | Meta-analytic effect sizes<br>$n$ | Primary studies<br>$k$ | Overall grand mean $d$ | 95% CI lower limit | 95% CI upper limit | $S_d^2$ | $E(S_{e_{a_i}}^2)$ | $\hat{\sigma}_d^2$ |
|-----------------------------|----------------------|-----------------------------------|------------------------|------------------------|--------------------|--------------------|---------|--------------------|--------------------|
| Overall                     |                      |                                   |                        |                        |                    |                    |         |                    |                    |
| Averaged over meta-analyses | 10                   | 10                                | 1178                   | 0.310                  | 0.302              | 0.320              | 0.158   | < 0.001            | 0.158              |
| Averaged over subgroup ES   | 10                   | 38                                | 1041                   | 0.303                  | 0.292              | 0.313              | 0.175   | < 0.001            | 0.175              |
| Unique ES                   | 10                   | 10                                | 663                    | 0.310                  | 0.280              | 0.340              | N/A     | N/A                | N/A                |
| Interventions               |                      |                                   |                        |                        |                    |                    |         |                    |                    |
| Appeals                     | 1                    | 1                                 | 10                     | 0.279                  | 0.279              | 0.279              | N/A     | N/A                | N/A                |
| Commitment                  | 3                    | 3                                 | 67                     | 0.272                  | 0.261              | 0.284              | 0.002   | < 0.001            | 0.002              |
| Education                   | 5                    | 5                                 | 121                    | 0.087                  | 0.076              | 0.099              | 0.004   | < 0.001            | 0.004              |
| Feedback                    | 4                    | 4                                 | 120                    | 0.159                  | 0.149              | 0.169              | 0.003   | < 0.001            | 0.003              |
| Financial incentives        | 4                    | 6                                 | 73                     | 0.317                  | 0.296              | 0.338              | 0.008   | 0.001              | 0.007              |
| Social Comparison           | 5                    | 9                                 | 199                    | 0.370                  | 0.351              | 0.389              | 0.019   | < 0.001            | 0.019              |
| Outcomes                    |                      |                                   |                        |                        |                    |                    |         |                    |                    |
| Conservation                | 6                    | 13                                | 404                    | 0.254                  | 0.239              | 0.270              | 0.026   | < 0.001            | 0.026              |
| Consumption                 | 2                    | 3                                 | 18                     | 0.197                  | 0.178              | 0.217              | 0.002   | 0.002              | < 0.001            |
| Littering                   | 1                    | 1                                 | 22                     | 0.519                  | 0.519              | 0.519              | N/A     | N/A                | N/A                |
| Recycling                   | 4                    | 9                                 | 103                    | 0.273                  | 0.236              | 0.309              | 0.035   | < 0.001            | 0.035              |
| Transportation              | 4                    | 5                                 | 57                     | 0.079                  | 0.064              | 0.093              | 0.003   | < 0.001            | 0.003              |
